# Supplementary material for: Preparation and Modification of Biomass-Based Functional Rubbers for Removing Mercury(II) from Aqueous Solution
Source: PubMed Central journal article supplement (PMC7040720; doi:10.3390/ma13030632), 2020-01-31

# Supplementary Materials: Preparation and Modification of Biomass-based Functional Rubbers for Removing Mercury(II) from Aqueous Solution

Yurong Chen, Akram Yasin, Yagang Zhang, Xingjie Zan, Yanxia Liu and Letao Zhang

**Table S1.** Synthesis conditions of biomass-based functional rubbers.

| Samples | Components  | Mass Ratio of Reactants | Temperature (°C) | Time of Gelation <sup>1</sup> (min) |
|---------|-------------|-------------------------|------------------|-------------------------------------|
| SCO     | S:CO        | 1:1                     | 150              | 30                                  |
| SCO2V1  | S:CO:2-VP   | 1:1:0.025               | 150              | 20                                  |
| SCO2V2  | S:CO:2-VP   | 1:1:0.05                | 150              | 25                                  |
| SCO2V3  | S:CO:2-VP   | 1:1:0.075               | 150              | 28                                  |
| SCO2V4  | S:CO:2-VP   | 1:1:0.1                 | 150              | 30                                  |
| SCO2V5  | S:CO:2-VP   | 1:1:0.2                 | 150              | 38                                  |
| SCO4V1  | S:CO:4-VP   | 1:1:0.025               | 150              | 15                                  |
| SCO4V2  | S:CO:4-VP   | 1:1:0.05                | 150              | 19                                  |
| SCO4V3  | S:CO:4-VP   | 1:1:0.075               | 150              | 22                                  |
| SCO4V4  | S:CO:4-VP   | 1:1:0.1                 | 150              | 28                                  |
| SCOA1   | S:CO:AEMA   | 1:1:0.025               | 150              | 30                                  |
| SCOA2   | S:CO:AEMA   | 1:1:0.05                | 150              | 25                                  |
| SCOA3   | S:CO:AEMA   | 1:1:0.075               | 150              | 20                                  |
| SCOA4   | S:CO:AEMA   | 1:1:0.1                 | 150              | 18                                  |
| SCOA5   | S:CO:AEMA   | 1:1:0.2                 | 150              | 18                                  |
| SCOA6   | S:CO:AEMA   | 1:1:0.3                 | 150              | 15                                  |
| SCOA7   | S:CO:AEMA   | 1:1:0.4                 | 150              | 15                                  |
| SCOE1   | S:CO:EMAB   | 1:1:0.025               | 150              | 20                                  |
| SCOE2   | S:CO:EMAB   | 1:1:0.05                | 150              | 25                                  |
| SCOE3   | S:CO:EMAB   | 1:1:0.075               | 150              | 28                                  |
| SCOE4   | S:CO:EMAB   | 1:1:0.1                 | 150              | 30                                  |
| SCOE5   | S:CO:EMAB   | 1:1:0.2                 | 150              | 32                                  |
| SCOE6   | S:CO:EMAB   | 1:1:0.3                 | 150              | 35                                  |
| SCOE7   | S:CO:EMAB   | 1:1:0.4                 | 150              | 38                                  |
| SCODM1  | S:CO:DMAEMA | 1:1:0.025               | 150              | 18                                  |
| SCODM2  | S:CO:DMAEMA | 1:1:0.05                | 150              | 25                                  |
| SCODM3  | S:CO:DMAEMA | 1:1:0.075               | 150              | 30                                  |
| SCODM4  | S:CO:DMAEMA | 1:1:0.1                 | 150              | 36                                  |
| SCODM5  | S:CO:DMAEMA | 1:1:0.2                 | 150              | 40                                  |

Time of gelation<sup>1</sup> was the period from the moment that elemental sulfur and cottonseed oil were mixed fully under stirring vigorously at 150 °C to the moment that the mixture (including the mixture after adding modifiers) got gelation completely.

**Table S2.** The adsorption kinetic fitting parameters of SCOA2 for  $\text{Hg}^{2+}$ .

| Model               | $Q_e$ ( $\text{mg g}^{-1}$ ) | $k$ ( $\text{h}^{-1}$ ) | $R^2$  |
|---------------------|------------------------------|-------------------------|--------|
| Pseudo-first-order  | 118.4                        | 0.9227                  | 0.9848 |
| Pseudo-second-order | 124.4                        | 0.01454                 | 0.9998 |

**Table S3.** The fitting parameters of adsorption isotherm of SCOA2 for  $\text{Hg}^{2+}$ .

| Langmuir Model                  |        |        | Freundlich Model |       |        | Langmuir- Freundlich Model      |          |          |        |
|---------------------------------|--------|--------|------------------|-------|--------|---------------------------------|----------|----------|--------|
| $Q_m$<br>( $\text{mg g}^{-1}$ ) | $b_L$  | $R^2$  | $K_F$            | $n_F$ | $R^2$  | $Q_m$<br>( $\text{mg g}^{-1}$ ) | $b_{LF}$ | $n_{LF}$ | $R^2$  |
| 370.4                           | 0.0364 | 0.9704 | 67.53            | 3.637 | 0.7956 | 343.3                           | 0.0091   | 0.6711   | 0.9914 |

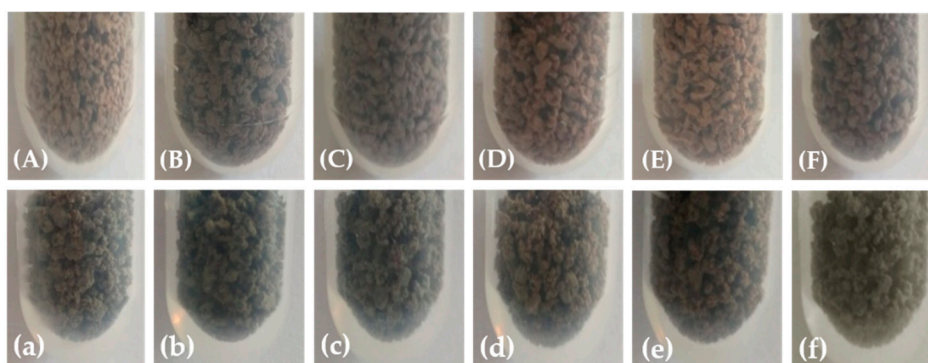**Figure S1.** Digital photos of real sample particles before and after mercury adsorption: (A) SCO, (B) SCO2V, (C) SCO4V, (D) SCOA, (E) SCOE, (F) SCODM, (a) SCO- $\text{Hg}^{2+}$ , (b) SCO2V- $\text{Hg}^{2+}$ , (c) SCO4V- $\text{Hg}^{2+}$ , (d) SCOA- $\text{Hg}^{2+}$ , (e) SCOE- $\text{Hg}^{2+}$ , (f) SCODM- $\text{Hg}^{2+}$  (when mass of modifiers was 5% of sulfur mass, corresponding samples were chosen for taking SEM images).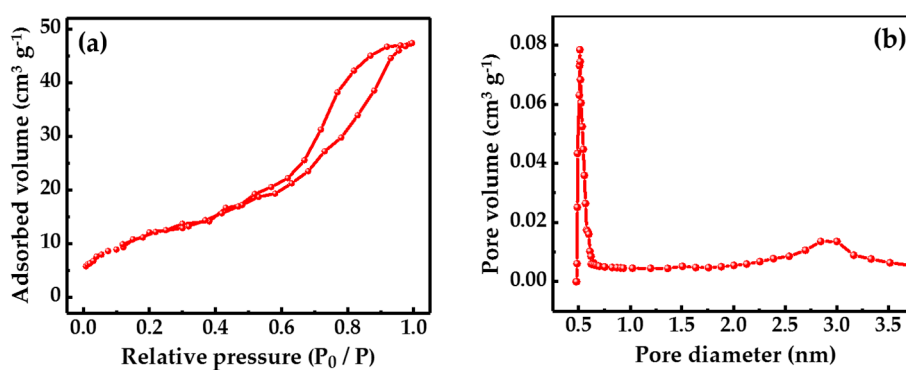**Figure S2.** (a)  $\text{N}_2$  adsorption-desorption isotherm of SCOA2, (b) pore diameter distribution curve of SCOA2.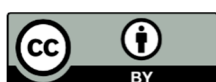

Supplement: materials-13-00632-s001.pdf [file materials-13-00632-s001.pdf]
